# Supplementary material
Source: PubMed Central journal article supplement (PMC7736452)

A

The BirA enzyme and a tagged bait protein are expressed in yeast

Biotinylated product accumulates over time

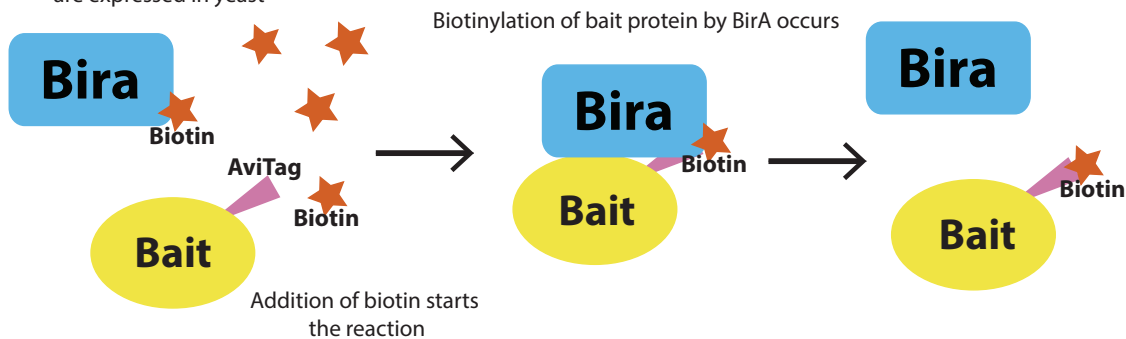

Addition of streptavidin causes the biotin-labeled band to run more slowly

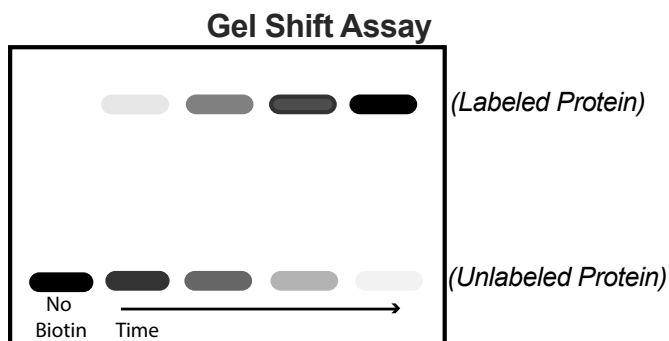

B

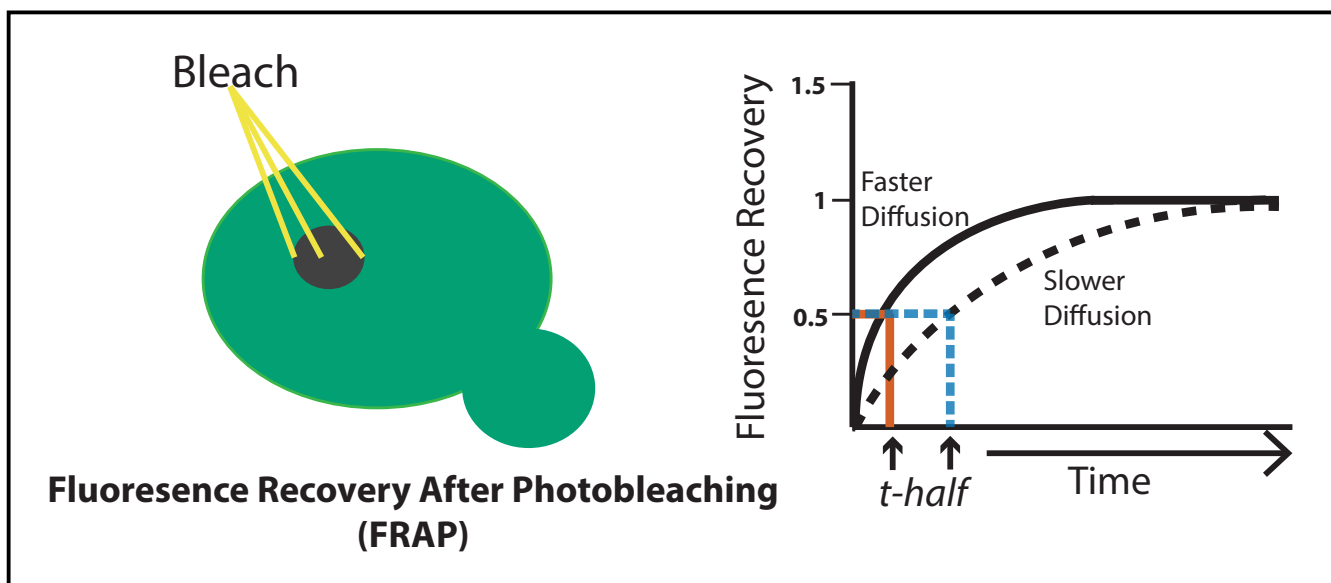

C

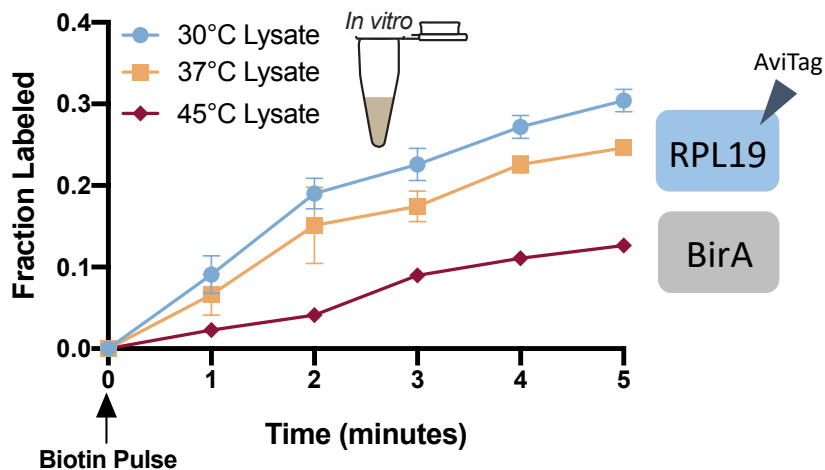

Supplement: NIHMS1637948-supplement-SF1.pdf [file NIHMS1637948-supplement-SF1.pdf]
