# Supplementary material
Source: PubMed Central journal article supplement (PMC7736452)

A

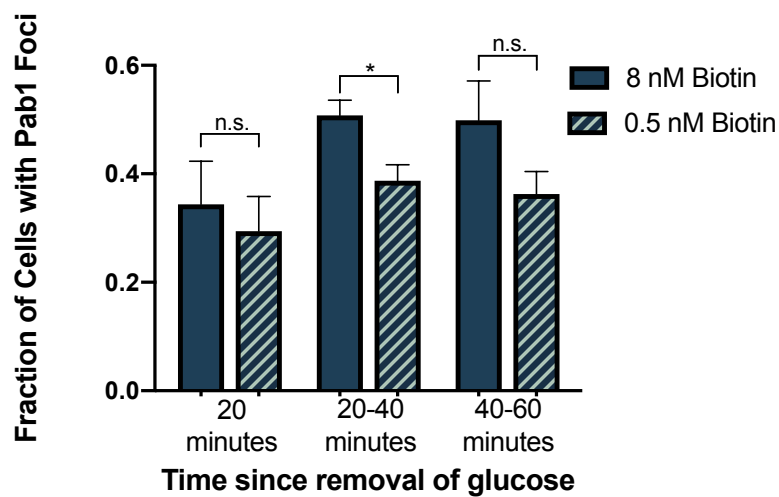

C

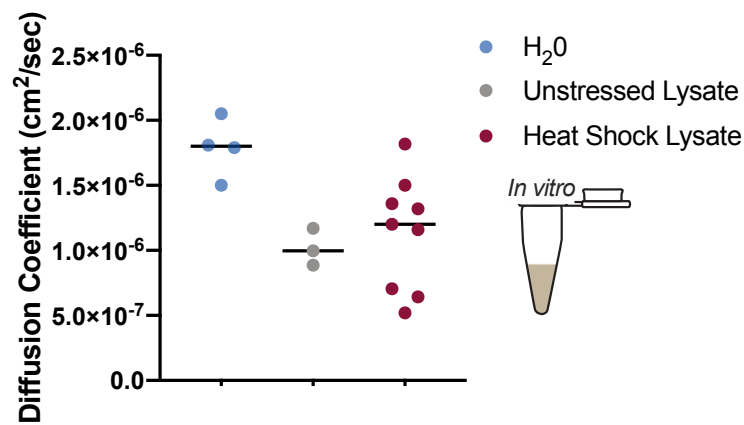

E

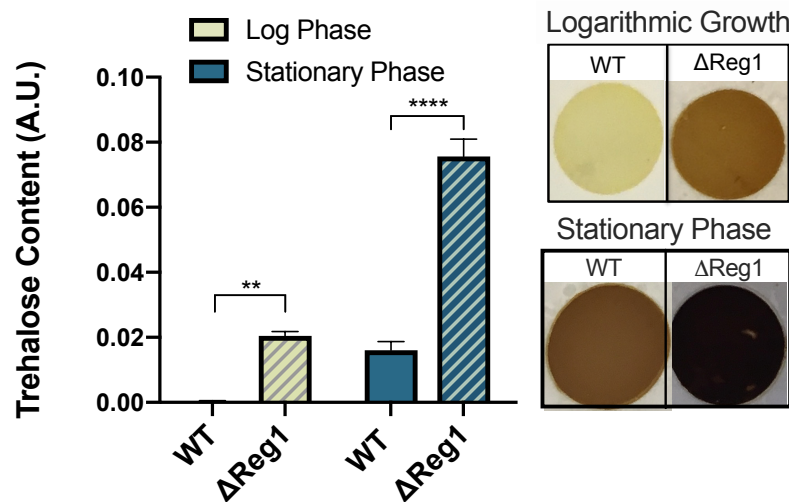

B

### Experimental Setup:

+ drug/vehicle  $\rightarrow$  40 mins at  $42^\circ\text{C}$   $\rightarrow$  cooled to  $24^\circ\text{C}$   $\rightarrow$  imaged

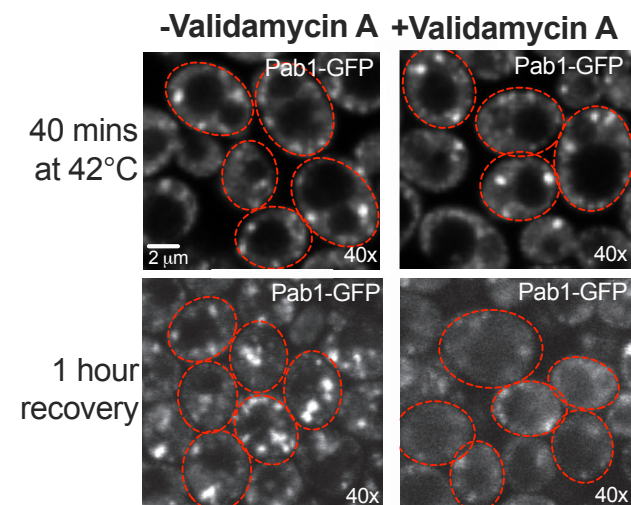

D

### Lysate from cells heated at $45^\circ\text{C}$ for 30 mins

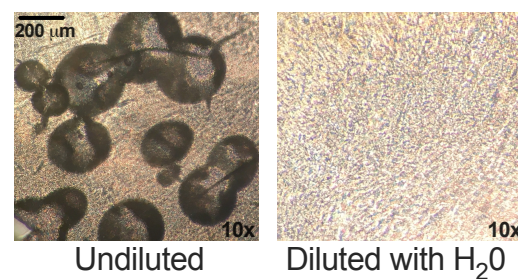

F

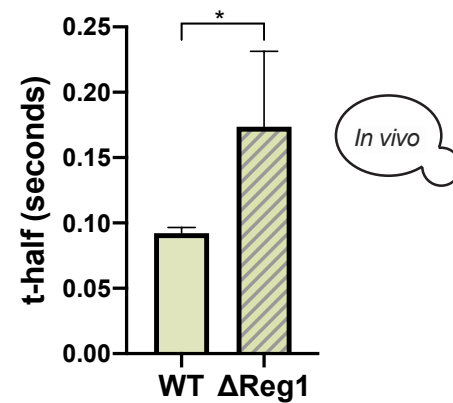

G

### Hypothetical FRAP Data

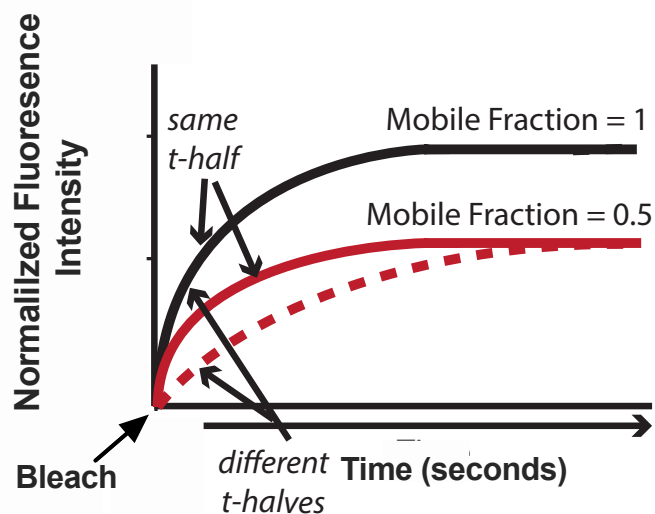

### Observed FRAP Data

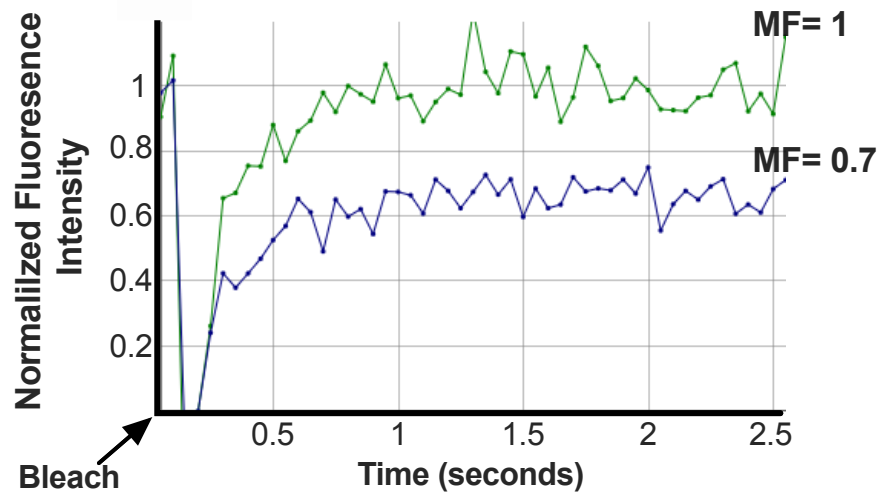

Supplement: NIHMS1637948-supplement-SF6.pdf [file NIHMS1637948-supplement-SF6.pdf]
