# Supplementary material
Source: PubMed Central journal article supplement (PMC7736452)

A

mKate2

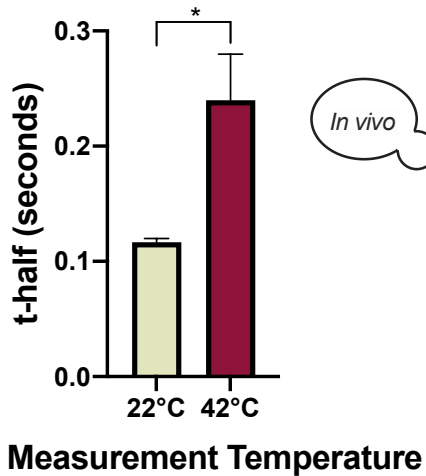

B

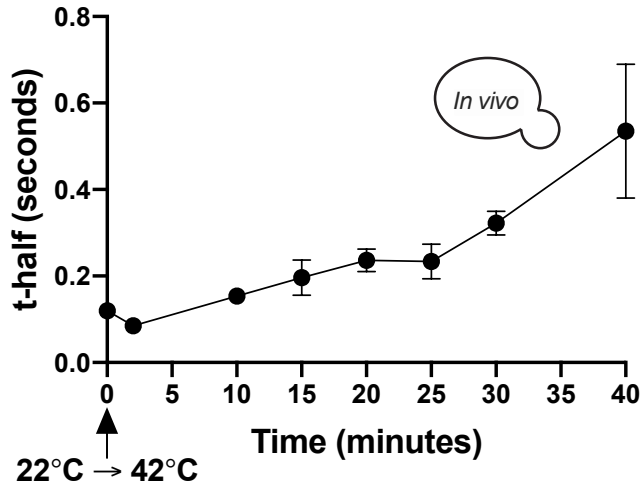

Supplement: NIHMS1637948-supplement-SF2.pdf [file NIHMS1637948-supplement-SF2.pdf]

A

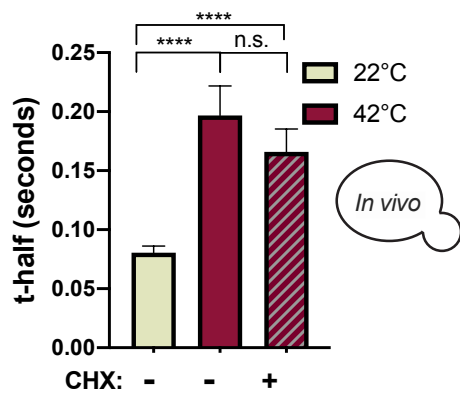

B

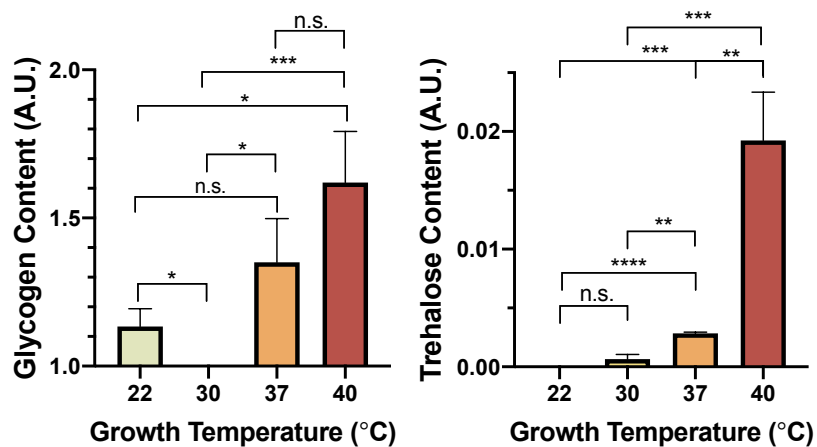

C

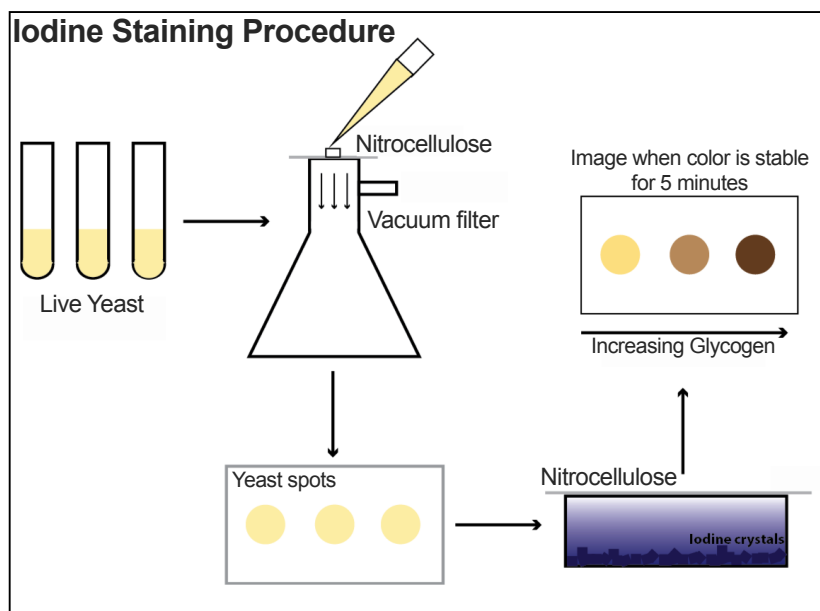

D

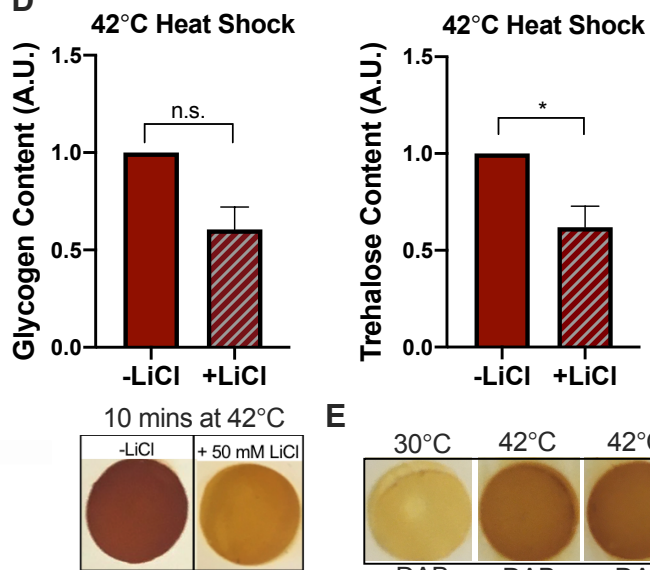

E

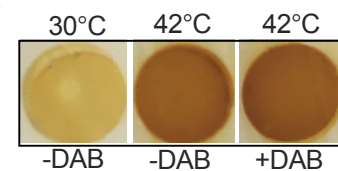

F

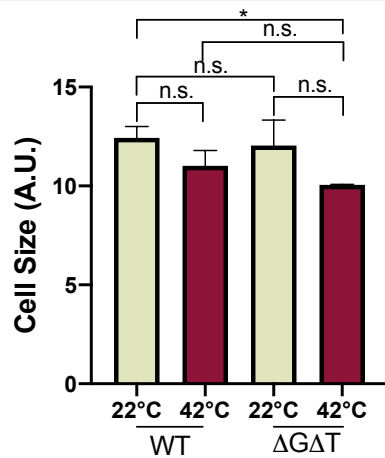

G

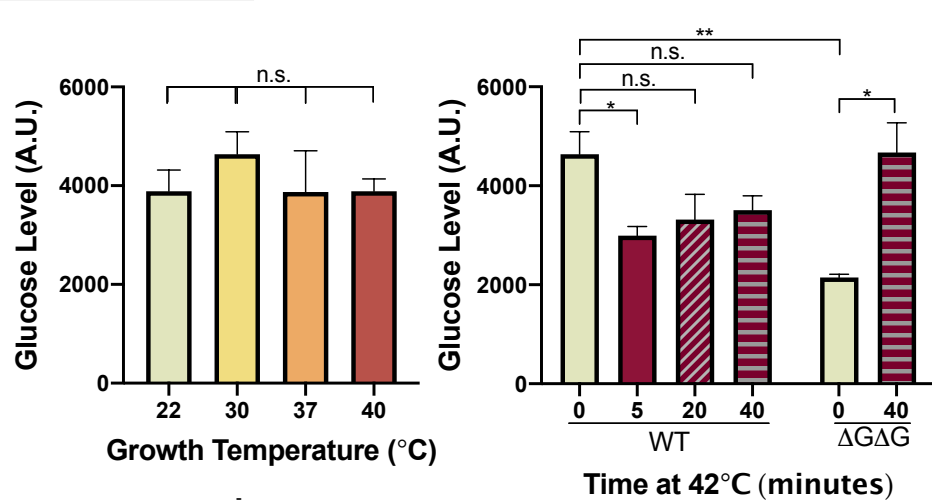

H

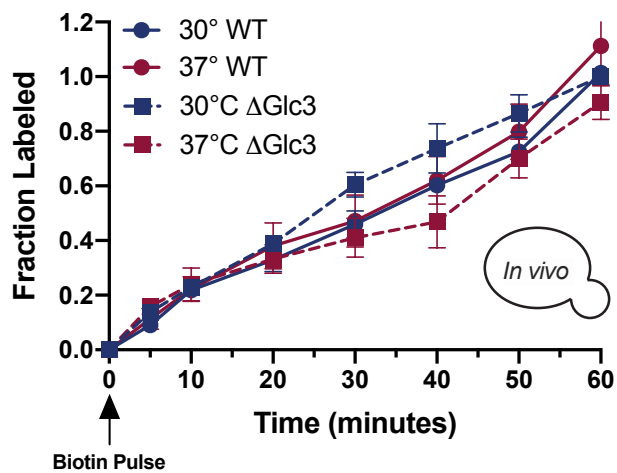

I

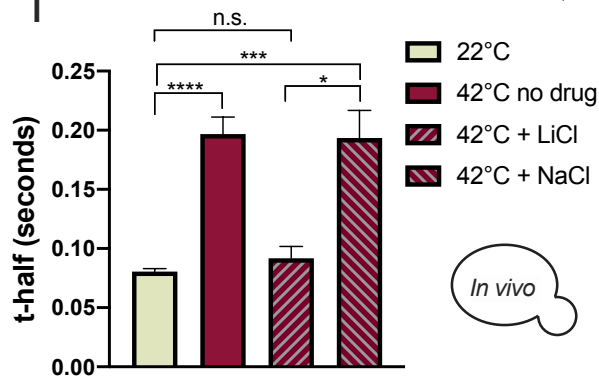

Supplement: NIHMS1637948-supplement-SF3.pdf [file NIHMS1637948-supplement-SF3.pdf]

A

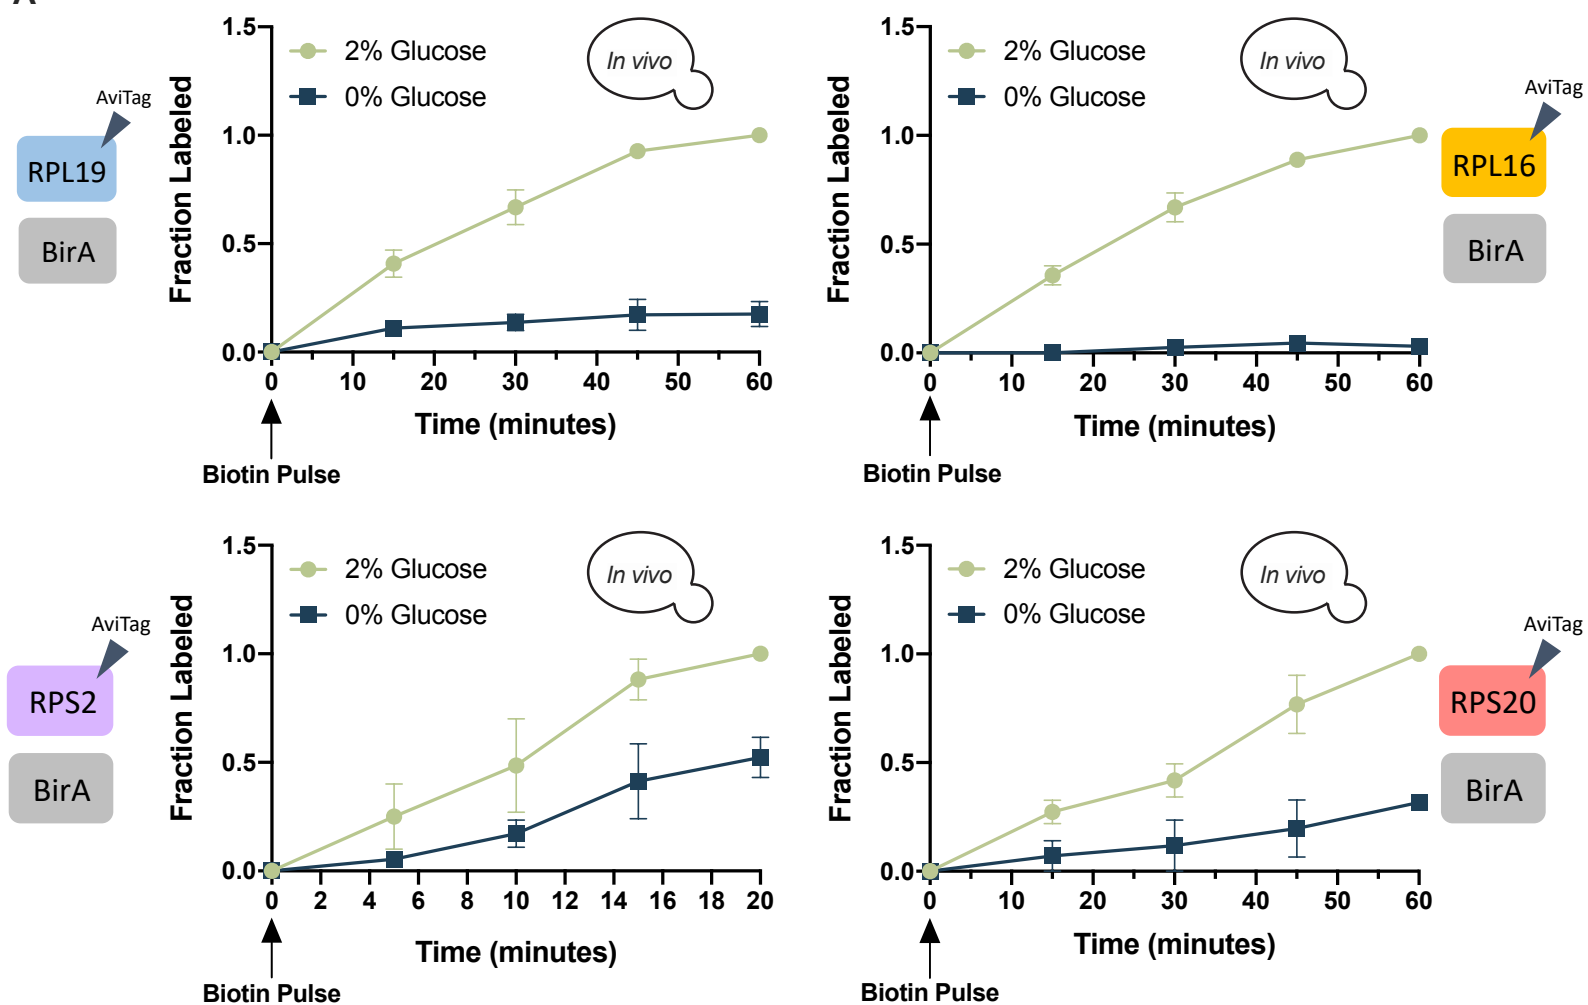

B

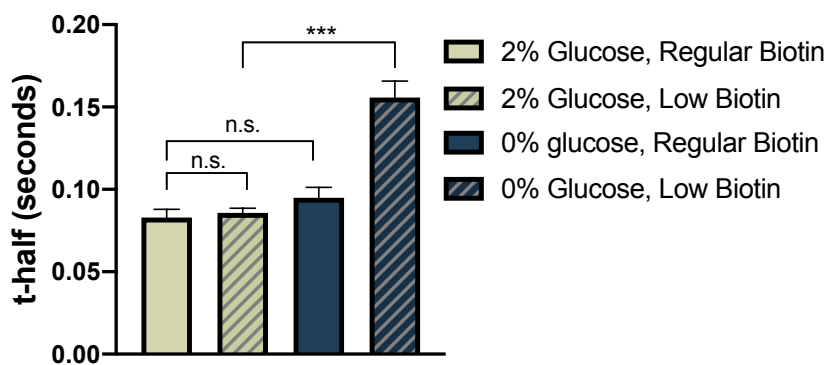

C

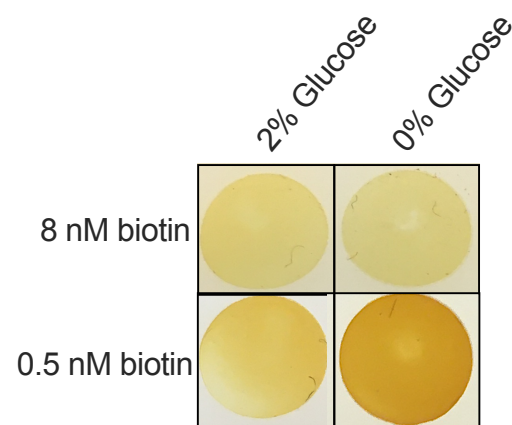

D

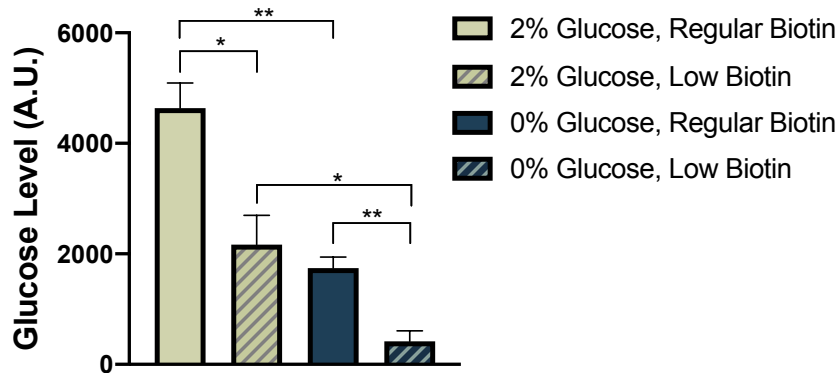

Supplement: NIHMS1637948-supplement-SF4.pdf [file NIHMS1637948-supplement-SF4.pdf]

**A****Bead Microrheology**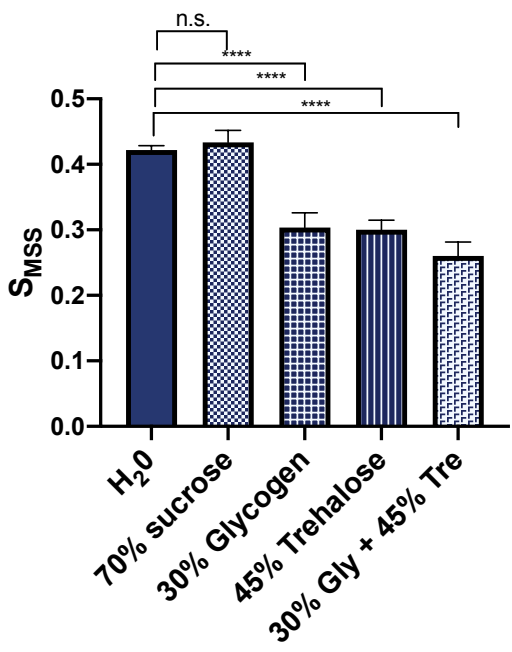**Bead Microrheology**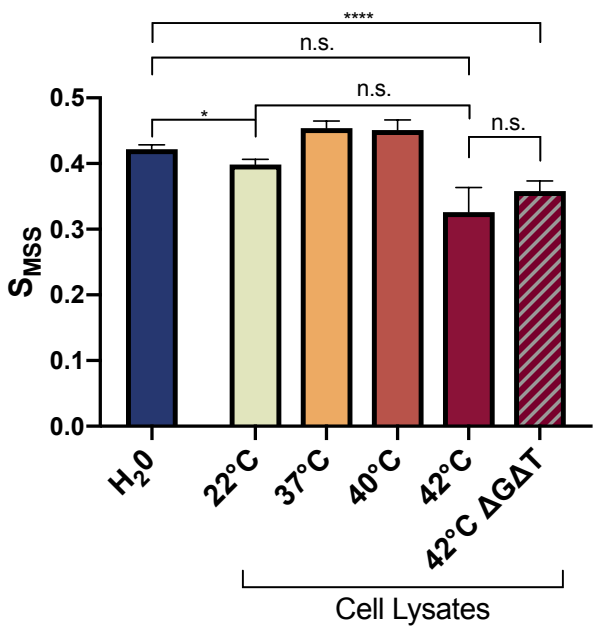**B**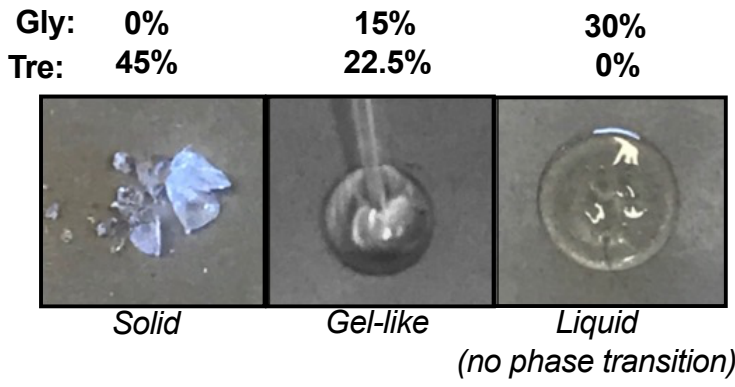**C****Purified GFP in Cell Lysates**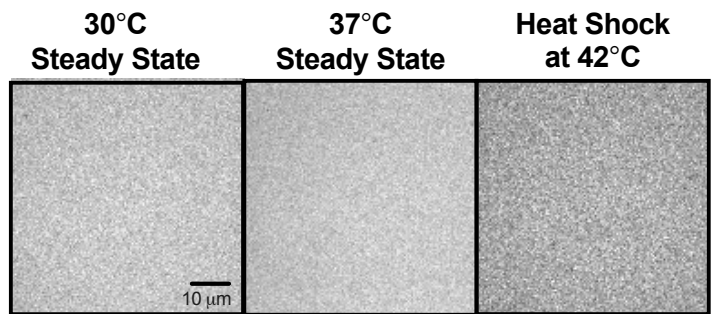

Supplement: NIHMS1637948-supplement-SF5.pdf [file NIHMS1637948-supplement-SF5.pdf]

A

## Genetically Encoded FRET-based ATP Nanosensor

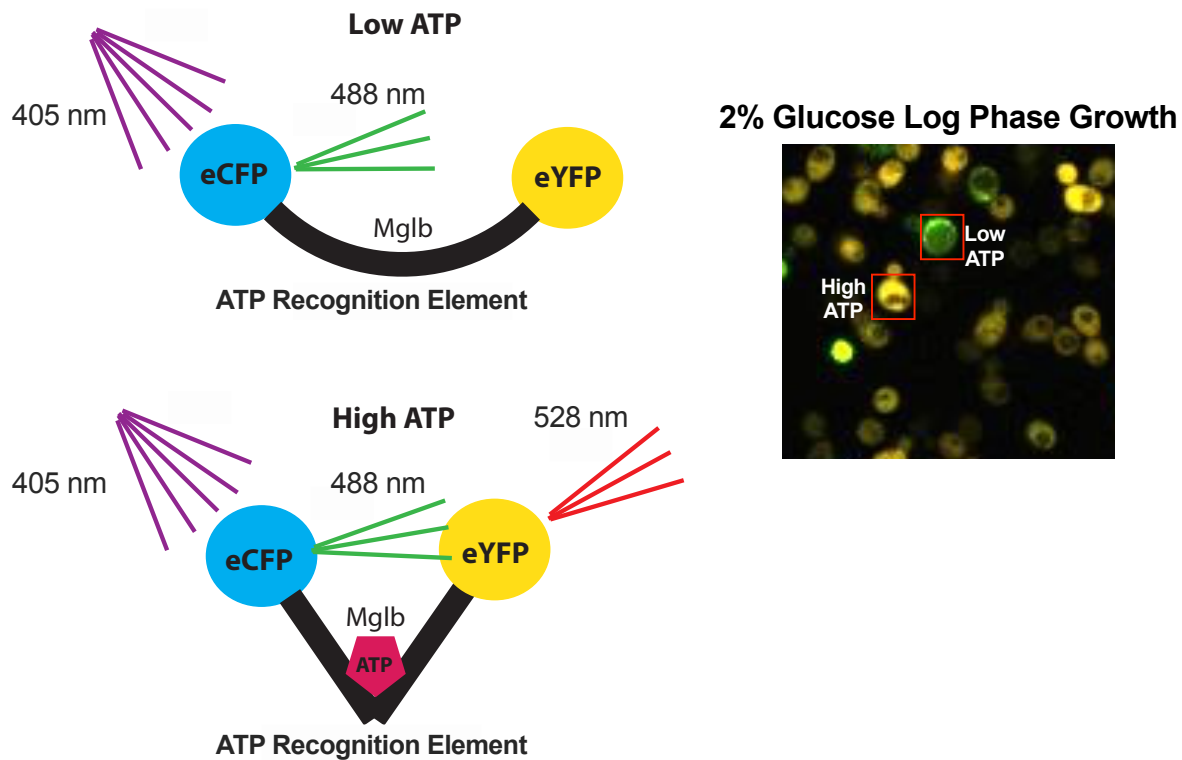

B

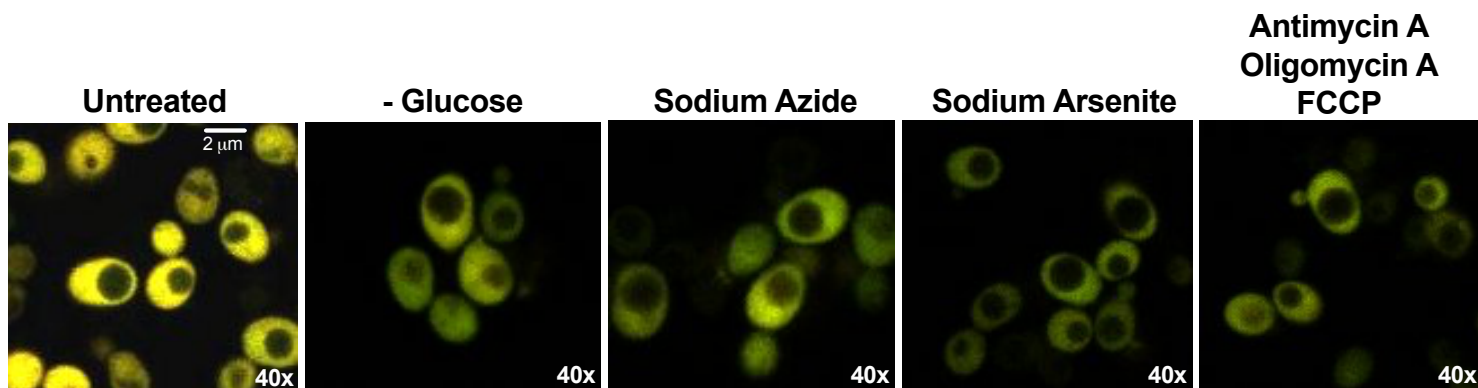

C

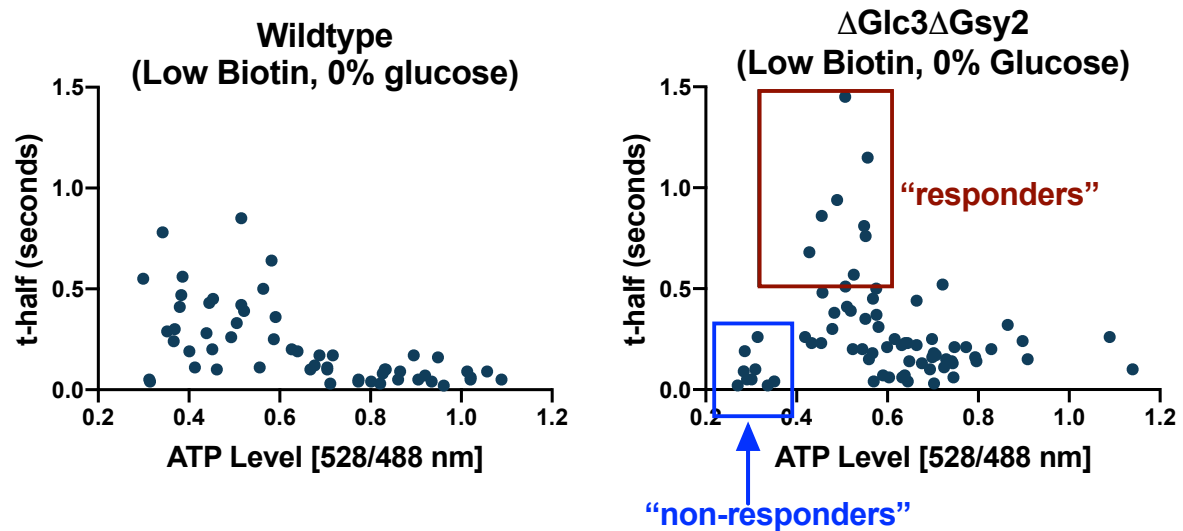

Supplement: NIHMS1637948-supplement-SF7.pdf [file NIHMS1637948-supplement-SF7.pdf]
